# Supplementary material for: Genome-Wide Association Study of Clinical Outcome After Aneurysmal Subarachnoid Haemorrhage: Protocol
Source: PubMed Central journal article supplement (PMC9232474; doi:10.1007/s12975-021-00978-2), 2022-01-06
Supplement: 12975_2021_978_MOESM1_ESM.pdf [file 12975_2021_978_MOESM1_ESM.pdf]

*Supplementary information*

Genome-wide association study of clinical outcome after aneurysmal subarachnoid haemorrhage: a protocol

Translational Stroke Research

Ben Gaastra, Sheila Alexander, Mark K. Bakker, Hemant Bhagat, Philippe Bijlenga, Spiros Blackburn, Sylvain Doré, Malie K. Collins, Christoph Griessenauer, Philipp Hendrix, Eun Pyo Hong, Isabel C. Hostettler, Henry Houlden, Koji Ihara, Jin Pyeong Jeon, Bong Jun Kim, Munish Kumar, Sandrine Morel, PA Nyquist, Dianxu Ren, Ynte M. Ruigrok, David Werring, Ian Galea\*, Diederik Bulters, Will Tapper

\*corresponding author email: i.galea@soton.ac.uk

| Data field                            | Code and definition                                                                                                                                                                                                                                                                                                                                                                                                                                                                                                                                                                                                                                                                   |
|---------------------------------------|---------------------------------------------------------------------------------------------------------------------------------------------------------------------------------------------------------------------------------------------------------------------------------------------------------------------------------------------------------------------------------------------------------------------------------------------------------------------------------------------------------------------------------------------------------------------------------------------------------------------------------------------------------------------------------------|
|                                       | <b>Inclusion</b>                                                                                                                                                                                                                                                                                                                                                                                                                                                                                                                                                                                                                                                                      |
| Data field 41270<br>ICD 10 codes      | I600 I60.0 Subarachnoid haemorrhage from carotid siphon and bifurcation<br><br>I601 I60.1 Subarachnoid haemorrhage from middle cerebral artery<br><br>I602 I60.2 Subarachnoid haemorrhage from anterior communicating artery<br><br>I603 I60.3 Subarachnoid haemorrhage from posterior communicating artery<br><br>I604 I60.4 Subarachnoid haemorrhage from basilar artery<br><br>I605 I60.5 Subarachnoid haemorrhage from vertebral artery<br><br>I606 I60.6 Subarachnoid haemorrhage from other intracranial arteries<br><br>I607 I60.7 Subarachnoid haemorrhage from intracranial artery, unspecified<br><br>I609 I60.9 Subarachnoid haemorrhage, unspecified<br>Ruptured aneurysm |
| Data field 41271<br>ICD9 codes        | 430 Subarachnoid haemorrhage<br><br>4309 Subarachnoid haemorrhage                                                                                                                                                                                                                                                                                                                                                                                                                                                                                                                                                                                                                     |
| Data field 42040<br>Primary care data | G60 Equates to ICD-10 code I609<br><br>G600 Equates to ICD-10 code I607                                                                                                                                                                                                                                                                                                                                                                                                                                                                                                                                                                                                               |

|                                                         |       |                                                      |
|---------------------------------------------------------|-------|------------------------------------------------------|
|                                                         | G601  | Equates to ICD-10 code I600                          |
|                                                         | G602  | Equates to ICD-10 code I601                          |
|                                                         | G603  | Equates to ICD-10 code I602                          |
|                                                         | G605  | Equates to ICD-10 code I604                          |
|                                                         | G606  | Equates to ICD-10 code I605                          |
|                                                         | G60X  | Equates to ICD-10 code I607                          |
|                                                         | G60z  | Equates to ICD-10 code I609                          |
|                                                         | Gyu60 | Equates to ICD-10 code I606                          |
|                                                         | Gyu6E | Equates to ICD-10 code I607                          |
|                                                         | X00Df | Equates to ICD-9 code 430                            |
|                                                         | X00Dg | Equates to ICD-10 code I609                          |
|                                                         | X204F | Equates to ICD-10 code I609                          |
|                                                         | Xa01c | Equates to ICD-10 code I606                          |
|                                                         | Xa01h | Equates to ICD-10 code I601                          |
|                                                         | Xa01i | Equates to ICD-10 code I606                          |
|                                                         | Xa01j | Equates to ICD-10 code I602                          |
|                                                         | Xa01k | Equates to ICD-10 code I603                          |
|                                                         | Xa01l | Equates to ICD-10 code I604                          |
|                                                         | Xa01m | Equates to ICD-10 code I606                          |
|                                                         | Xa01o | Equates to ICD-9 code 430                            |
| Data field 20002<br>Self-reported medical<br>conditions | 1086  | Subarachnoid haemorrhage                             |
| Exclusion                                               |       |                                                      |
| Data field 41270<br>ICD 10 codes                        | Q282  | Q28.2 Arteriovenous malformation of cerebral vessels |
|                                                         | Q283  | Q28.3 Other malformations of cerebral vessels        |

|                                       |                                                                                                                                                  |
|---------------------------------------|--------------------------------------------------------------------------------------------------------------------------------------------------|
|                                       | S-T Injury, poisoning and certain other consequences of external causes                                                                          |
|                                       | V,W,X External causes of morbidity and mortality                                                                                                 |
| Data field 41271<br>ICD9 codes        | 74780 Arteriovenous aneurysm of brain<br><br>74781 Other anomalies of cerebral vessels<br><br>800-900 Trauma and injury                          |
| Data field 42040<br>Primary care data | P7y01 Equates to ICD-10 code Q282<br><br>P7y02 Equates to ICD-10 code Q283<br><br>S, U Equates to ICD-10 codes S,T,V,W,X and ICD-9 codes 800-900 |

Supplementary Table 1. Inclusion and exclusion codes for aSAH cases in the UK Biobank.  
ICD: International Classification of Diseases.
